# Supplementary material for: Heating Drinking Water in Cold Season Improves Growth Performance via Enhancing Antioxidant Capacity and Rumen Fermentation Function of Beef Cattle
Source: MDPI journal article supplement (doi:10.3390/antiox12081492), 2023-07-26
Supplement: s1 [file s1]

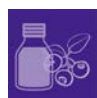

## Supplementary material

**Table S1.** Diet composition and nutrition levels (% , DM basis)

| Ingredient Composition             | Content |
|------------------------------------|---------|
| Corn                               | 35.0    |
| DDGS                               | 5.00    |
| Corn germ meal                     | 15.0    |
| Cotton seed                        | 4.00    |
| Whole corn silage                  | 34.0    |
| Wheat straw                        | 5.50    |
| Premix                             | 0.50    |
| NaHCO <sub>3</sub>                 | 0.50    |
| NaCl                               | 0.50    |
| Analyzed nutritional composition   |         |
| DM                                 | 51.2    |
| CP                                 | 11.3    |
| ADF                                | 17.4    |
| NDF                                | 32.8    |
| EE                                 | 4.07    |
| Calculated nutritional composition |         |
| NEg; Mcal/kg                       | 1.56    |

DM: dry matter; CP: crude protein; NDF: neutral detergent fiber; ADF: acid detergent fiber; EE: ether extract; Premix: Fe 12 g/kg, Mn 1 g/kg, Cu 1 g/kg, Zn 11 g/kg, I 30 mg/kg, Se 30 mg/kg, Co 20 mg/kg, Vitamin A 450,000 IU/kg, Vitamin D<sub>3</sub> 60,000 IU/kg, Vitamin E 2000 mg/kg; NEg was estimated from CNCPS (6.0) values.

**Table S2.** Sequences of primer used to analyze gene expression in rumen epithelial tissue by quantitative PCR.

| Target    | Primer Sequences (5'-3')    | Gene Base Number | PCR Product Size (bp) |
|-----------|-----------------------------|------------------|-----------------------|
| β-actin   | F: ACTGTTAGCTGCGTTACACCTT   | 22               | 167                   |
|           | R: TGCTGTCACCTTCACCGTTC     | 20               |                       |
| ZO-1      | F: TCAACCACAATCTCTTGCCGAATG | 24               | 125                   |
|           | R: GGTCTCCACGCCACTGTCAA     | 20               |                       |
| Claudin-4 | F: CTTCCATCCTTCCTGCTCCACTCT | 24               | 163                   |
|           | R: CCTCTAAACCTGTCCGTCCACTCT | 24               |                       |
| Occludin  | F: GCTACGGCTATGGCTACGGTTATG | 24               | 193                   |
|           | R: AGGACGGCGGTCACTATTATCACA | 24               |                       |
| MCT1      | F: GGTGGAGGTCCTATCAGCAGTGT  | 23               | 228                   |
|           | R: TGCCAGCGGTCGTCTCTTATAGAA | 24               |                       |
| MCT4      | F: GGAGGTGGAGCAGTTCCTGAAGA  | 23               | 131                   |
|           | R: ACGAGCGTTGACGGTCTCTGT    | 21               |                       |
| SGLT1     | F: CATCTCTACCGCCTGTGCTGGA   | 22               | 218                   |
|           | R: GCTGCCTCCTCTTCCTTCGTCAT  | 23               |                       |

ZO-1, zonula occludens-1; MCT1, monocarboxylic acid transporters 1; MCT4, monocarboxylic acid transporters 4; SGLT1, sodium-dependent glucose-linked transporter-1.

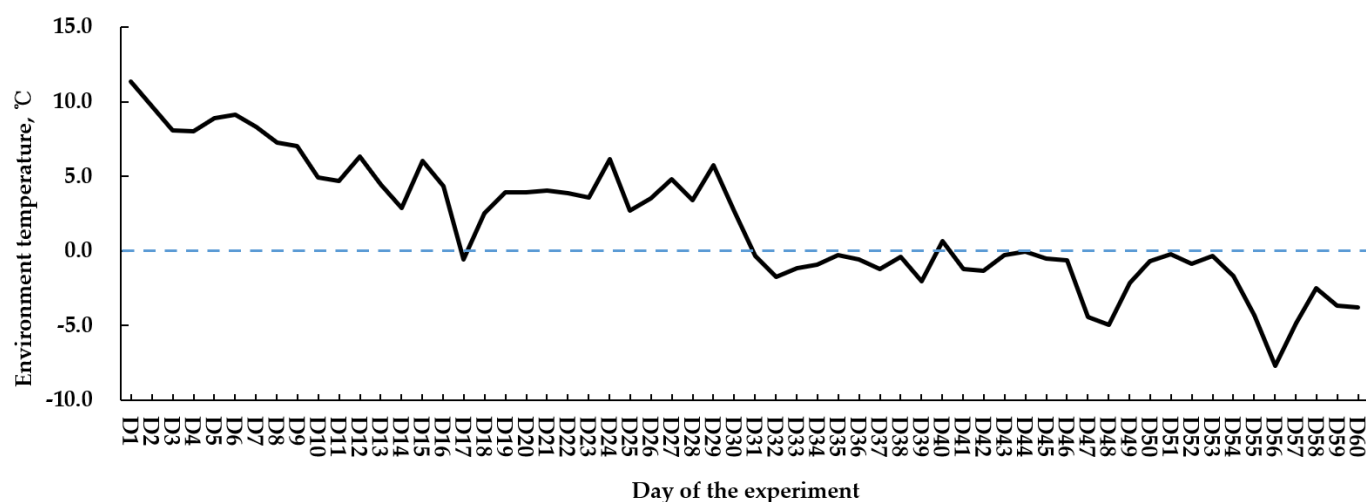

**Figure S1.** The average daily environment temperature during the experiment (°C).

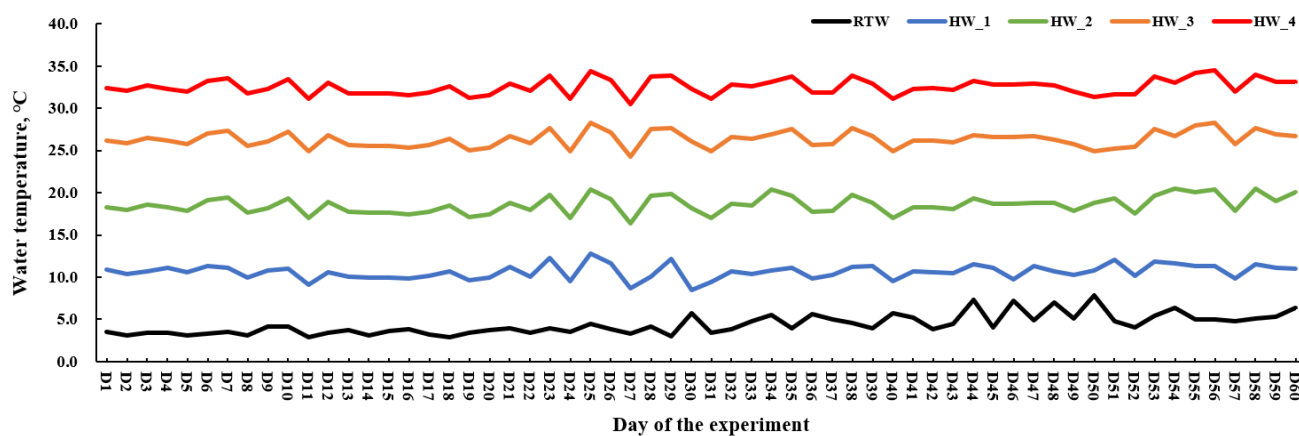

**Figure S2.** The average daily drinking water temperature of different treatments during the experiment (°C).

RTW, HW\_1, HW\_2, HW\_3 and HW\_4 mean drinking room temperature water at  $4.39 \pm 2.546^{\circ}\text{C}$ ,  $10.63 \pm 1.290^{\circ}\text{C}$ ,  $18.6 \pm 1.52^{\circ}\text{C}$ ,  $26.32 \pm 1.702^{\circ}\text{C}$ , and  $32.54 \pm 2.624^{\circ}\text{C}$  respectively.

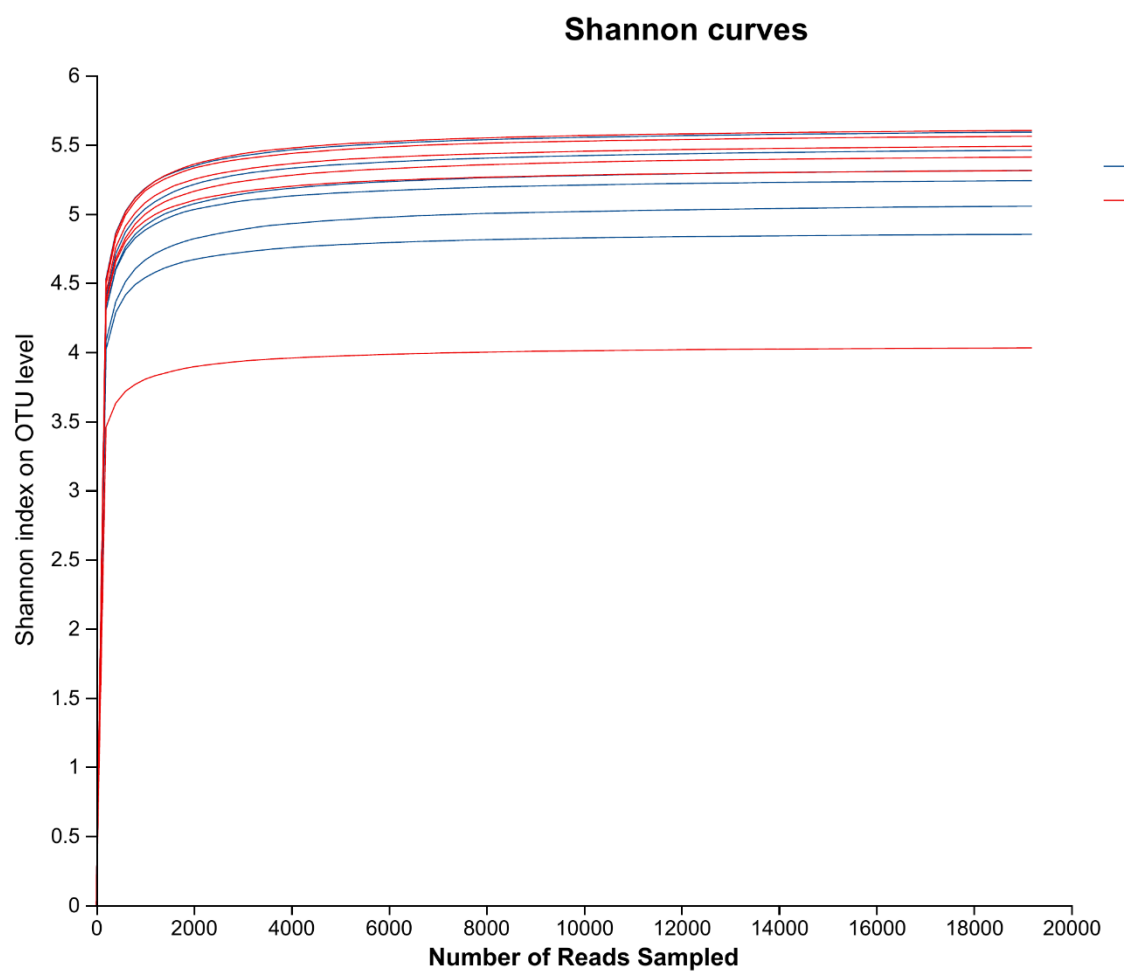

**Figure S3.** The rarefaction curves of remen liquid at OTU level of fattening cattle drinking heated water or room temperature water. All samples indicated that the diversity indices increased sharply and eventually flatten, suggesting that the sequencing data were substantial enough for reflecting the majority of microbial diversity information in the samples. RTW and HW\_2 mean drinking room temperature water at  $4.39 \pm 2.546^{\circ}\text{C}$  and heated water at  $18.6 \pm 1.52^{\circ}\text{C}$ , respectively.
